# Supplementary material
Source: MDPI journal article supplement (https://www.mdpi.com/2037-0164/13/4/34)
Supplement: s1 [file s1]

**Table S1.** Diary minimum (T min) and maximum (T max) temperature and relative humidity (R.H.) from April 19 to July 09, 2020. Londrina, Paraná State, Brazil.

| Date           | T min | T max | R.H. |
|----------------|-------|-------|------|
| April 19, 2020 | 13    | 28    | 72   |
| April 20, 2020 | 14    | 29    | 73   |
| April 21, 2020 | 14    | 29    | 68   |
| April 22, 2020 | 14    | 29    | 66   |
| April 23, 2020 | 13    | 27    | 64   |
| April 24, 2020 | 12    | 30    | 68   |
| April 25, 2020 | 15    | 31    | 74   |
| April 26, 2020 | 16    | 31    | 68   |
| April 27, 2020 | 16    | 28    | 65   |
| April 28, 2020 | 16    | 28    | 65   |
| April 29, 2020 | 12    | 29    | 65   |
| April 30, 2020 | 15    | 31    | 64   |
| May 1, 2020    | 17    | 31    | 62   |
| May 2, 2020    | 17    | 29    | 59   |
| May 3, 2020    | 14    | 27    | 68   |
| May 4, 2020    | 12    | 27    | 67   |
| May 5, 2020    | 12    | 28    | 69   |
| May 6, 2020    | 15    | 24    | 77   |
| May 7, 2020    | 9     | 23    | 61   |
| May 8, 2020    | 9     | 23    | 65   |
| May 9, 2020    | 9     | 26    | 69   |
| May 10, 2020   | 11    | 26    | 65   |
| May 11, 2020   | 12    | 28    | 66   |
| May 12, 2020   | 13    | 25    | 72   |
| May 13, 2020   | 16    | 23    | 88   |
| May 14, 2020   | 17    | 24    | 89   |
| May 15, 2020   | 14    | 24    | 81   |
| May 16, 2020   | 11    | 27    | 77   |
| May 17, 2020   | 12    | 28    | 67   |
| May 18, 2020   | 10    | 28    | 61   |
| May 19, 2020   | 13    | 27    | 57   |
| May 20, 2020   | 14    | 28    | 71   |
| May 21, 2020   | 12    | 27    | 73   |
| May 22, 2020   | 17    | 28    | 83   |
| May 23, 2020   | 9     | 18    | 88   |
| May 24, 2020   | 6     | 16    | 86   |
| May 25, 2020   | 7     | 19    | 80   |
| May 26, 2020   | 7     | 22    | 64   |
| May 27, 2020   | 7     | 24    | 61   |
| May 28, 2020   | 7     | 23    | 61   |
| May 29, 2020   | 7     | 25    | 62   |
| May 30, 2020   | 8     | 27    | 61   |
| May 31, 2020   | 10    | 27    | 62   |

|               |      |      |      |
|---------------|------|------|------|
| June 1, 2020  | 14   | 25   | 76   |
| June 2, 2020  | 16   | 18   | 99   |
| June 3, 2020  | 16   | 23   | 94   |
| June 4, 2020  | 15   | 18   | 98   |
| June 5, 2020  | 15   | 24   | 92   |
| June 6, 2020  | 12   | 21   | 91   |
| June 7, 2020  | 8    | 24   | 81   |
| June 8, 2020  | 13   | 27   | 82   |
| June 9, 2020  | 17   | 26   | 90   |
| June 10, 2020 | 17   | 29   | 83   |
| June 11, 2020 | 18   | 29   | 74   |
| June 12, 2020 | 16   | 29   | 77   |
| June 13, 2020 | 16   | 29   | 77   |
| June 14, 2020 | 14   | 24   | 86   |
| June 15, 2020 | 12   | 24   | 80   |
| June 16, 2020 | 13   | 26   | 79   |
| June 17, 2020 | 14   | 25   | 79   |
| June 18, 2020 | 14   | 25   | 80   |
| June 19, 2020 | 14   | 26   | 79   |
| June 20, 2020 | 14   | 27   | 76   |
| June 21, 2020 | 13   | 29   | 70   |
| June 22, 2020 | 12   | 27   | 69   |
| June 23, 2020 | 13   | 25   | 71   |
| June 24, 2020 | 10   | 25   | 73   |
| June 25, 2020 | 14   | 29   | 81   |
| June 26, 2020 | 16   | 20   | 98   |
| June 27, 2020 | 13   | 18   | 99   |
| June 28, 2020 | 12   | 20   | 88   |
| June 29, 2020 | 11   | 22   | 86   |
| June 30, 2020 | 12   | 26   | 82   |
| July 1, 2020  | 7    | 17   | 81   |
| July 2, 2020  | 4    | 19   | 79   |
| July 3, 2020  | 5    | 20   | 76   |
| July 4, 2020  | 6    | 21   | 81   |
| July 5, 2020  | 12   | 24   | 81   |
| July 6, 2020  | 15   | 25   | 84   |
| July 7, 2020  | 17   | 28   | 75   |
| July 8, 2020  | 13   | 20   | 86   |
| July 9, 2020  | 8,4  | 22   | 75   |
| Mean          | 12,5 | 25,2 | 75,5 |
